# Supplementary material for: Characterization of an Atypical Metalloproteinase Inhibitors Like Protein (Sbp8-1) From Scallop Byssus
Source: PubMed Central journal article supplement (PMC5975577; doi:10.3389/fphys.2018.00597), 2018-05-23
Supplement: Data_Sheet_1.pdf [file Data_Sheet_1.pdf]

## Characterization of an atypical metalloproteinase inhibitors like protein (Sbp8-1) from scallop byssus

Xiaokang Zhang<sup>1†</sup>, Xiaoting Dai<sup>1†</sup>, Lulu Wang<sup>1</sup>, Yan Miao<sup>1</sup>, Pingping Xu<sup>1</sup>, Pengyu Liang<sup>1</sup>, Bo Dong<sup>1,2</sup>, Zhenmin Bao<sup>1,3</sup>, Shi Wang<sup>1,2</sup>, Qianqian Lyu<sup>1,2\*</sup> and Weizhi Liu<sup>1,2\*</sup>

<sup>1</sup>MOE Key Laboratory of Marine Genetics and Breeding, College of Marine Life Sciences, Ocean University of China, Qingdao, China

<sup>2</sup>Laboratory for Marine Biology and Biotechnology, Qingdao National Laboratory for Marine Science and Technology, Qingdao, China

<sup>3</sup>Laboratory for Marine Fisheries Science and Food Production Processes, Qingdao National Laboratory for Marine Science and Technology, Qingdao, China

<sup>†</sup>These authors have contributed equally to this work.

### \*Correspondence

Dr. Weizhi Liu  
liuweizhi@ouc.edu.cn  
Dr. Qianqian Lyu  
lqqdo@163.com

### Supplemental material

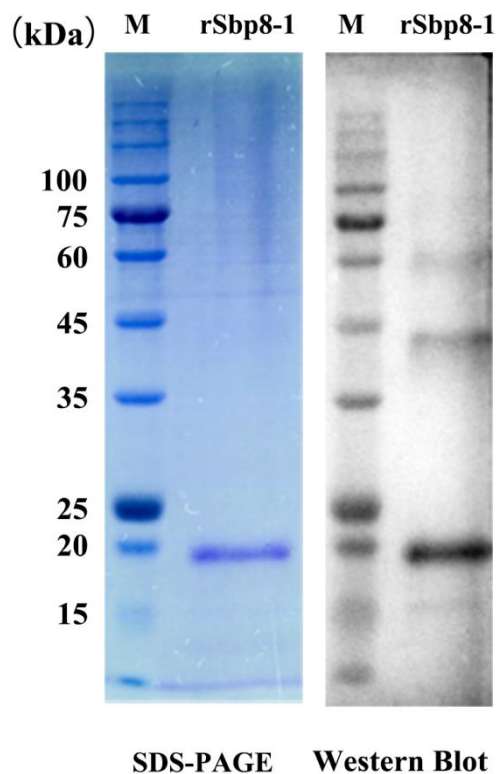

**S-Figure 1.** SDS-PAGE for the Sbp8-1 protein used as the antigen and western blot of Sbp8-1.

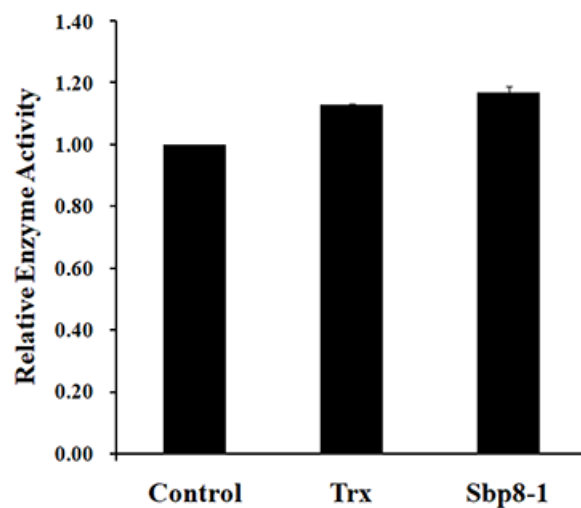

**S-Figure 2.** Inhibitory activity measurement of Sbp8-1 against type IV collagenase was conducted by succinyl - gelatin method. Each assay was performed in triplicates.

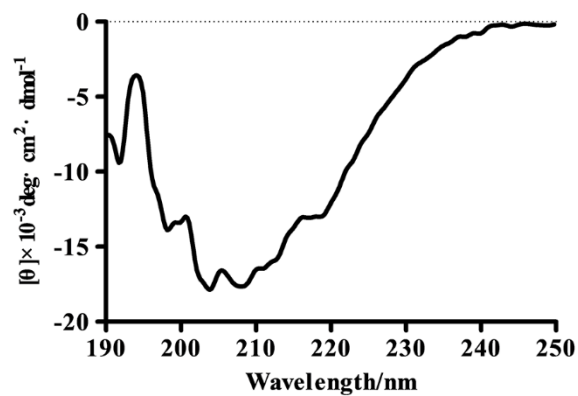

**S-Figure 3.** Circular dichroism spectrum measurement of Sbp8-1 without Trx tag.
